# Supplementary material
Source: PubMed Central journal article supplement (PMC4192073)
Supplement: NIHMS616061-supplement-1.pdf [file NIHMS616061-supplement-1.pdf]

## N-Me, a long range oncogenic enhancer in T-cell acute lymphoblastic leukemia

Daniel Herranz, Alberto Ambesi-Impiombato, Teresa Palomero, Stephanie A. Schnell, Laura Belver, Agnieszka A. Wendorff, Luyao Xu, Mireia Castillo, David Llobet-Navás, Carlos Cordon Cardo, Emmanuelle Clappier, Jean Soulier and Adolfo A. Ferrando

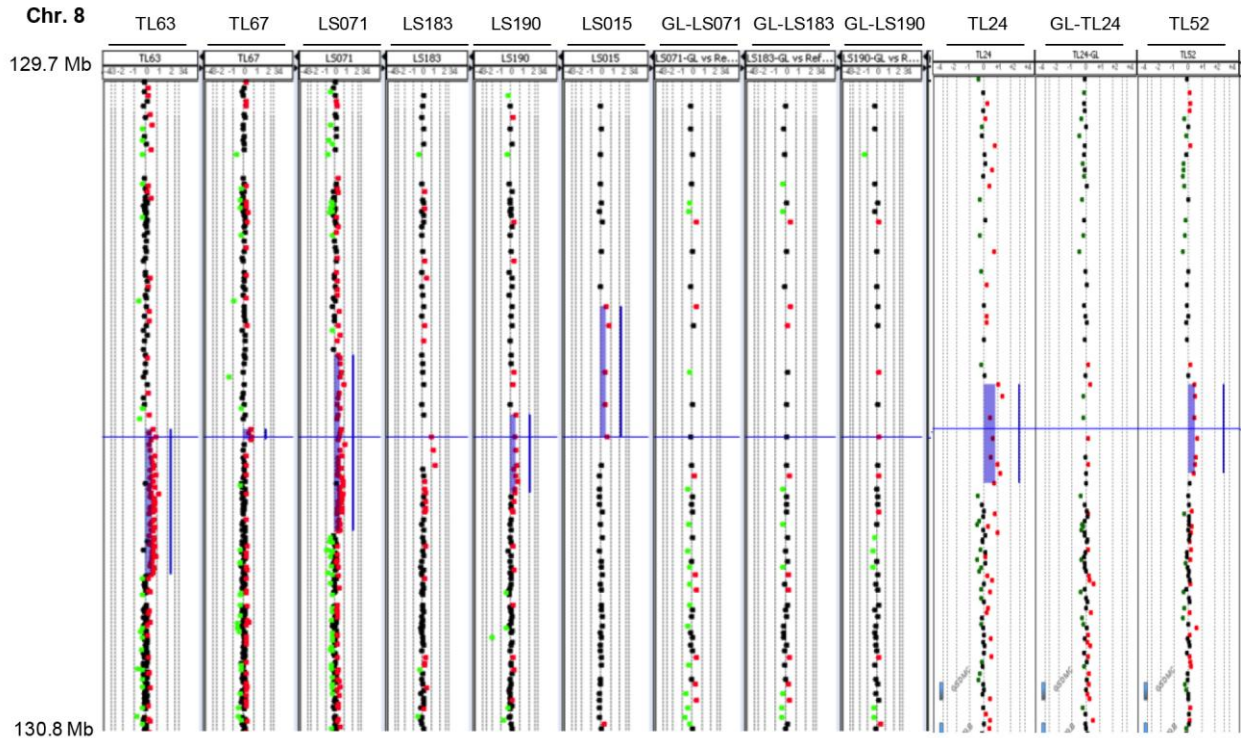

**Supplementary Figure 1.** Focal 8q24 duplications in T-ALL. plots showing recurrent duplications. Log<sub>2</sub> ratio signal of tumor DNA compared to a normal reference control for array comparative genomic hybridization probes at 8q24 in primary T-ALL samples is shown. Paired germ-line samples (GL) are shown when available. Genomic areas indicated by the blue bars correspond to high confidence duplications as predicted by the ADM-2 tool (Agilent Technologies).

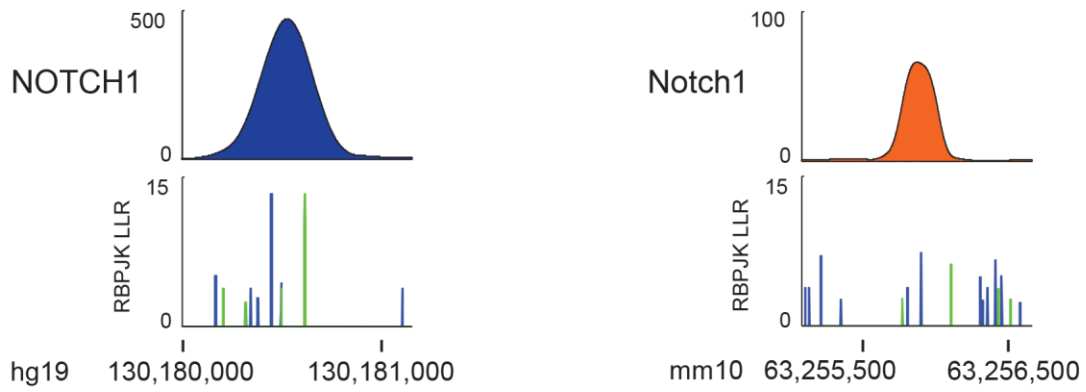

**Supplementary Figure 2.** Location of RBPJ binding sites within the NOTCH1 human and mouse N-Me enhancer sites. Top panels represent density of NOTCH1 ChIP-seq reads. Bottom panels indicate distribution of RBPJ matching sites (RBPJK LLR), with forward orientation sites shown as blue bars and reverse orientation sites shown as green bars. Y axis indicates likelihood of RBPJ matching (fold over random).

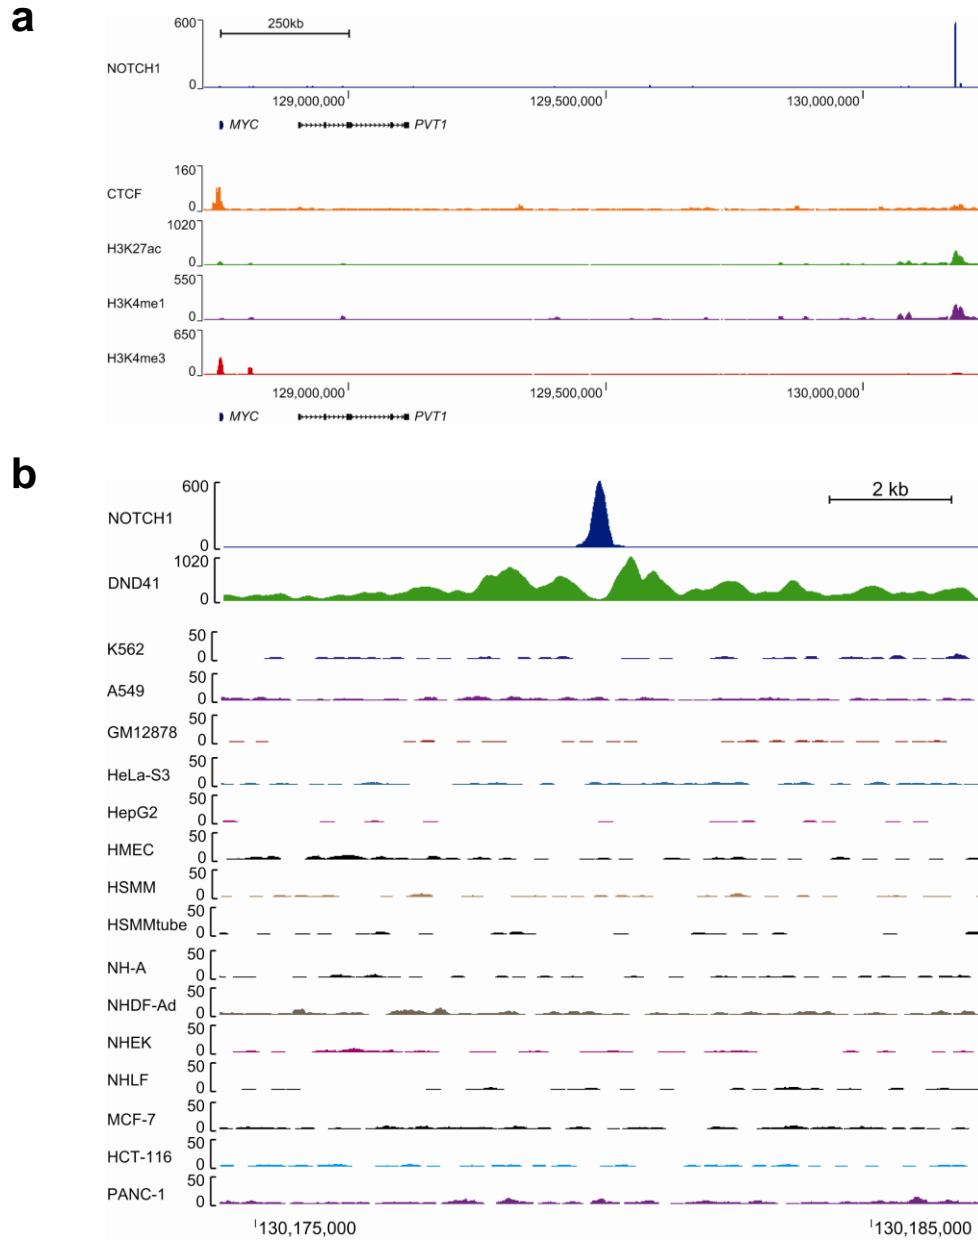

**Supplementary Figure 3.** Chromatin marks along windows containing the *MYC* +1.47 Mb NOTCH1 binding site (a) NOTCH1, CTCF, H3K27ac, H3K4me1 and H3K4me3 ChIP-seq occupancy along a 1.5 Mb window. NOTCH1 track represents ChIP-seq data from HPB-ALL cells. CTCF, H3K27ac, H3K4me1 and H3K4me3 tracks show ENCODE data in the DND41 T-ALL cell line. (b) H3K27ac ChIP-seq occupancy along a 10 Kb window in DND41 T-ALL cells and non T-ALL cell lines.

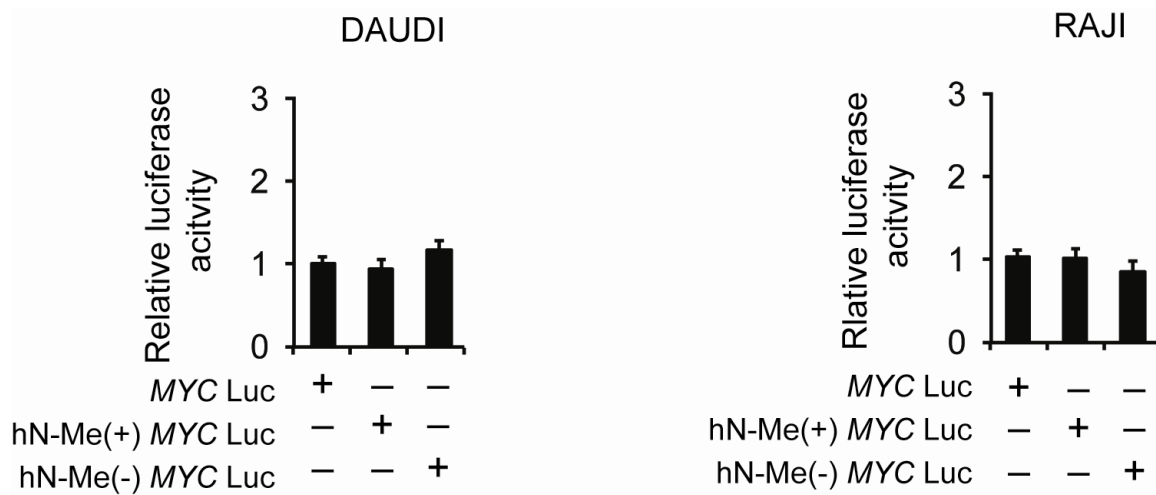

**Supplementary Figure 4.** Luciferase reporter activity in 293T cells transfected with of a *MYC* promoter construct (*MYC* Luc), a *MYC* promoter plus human N-Me enhancer in + orientation (hN-Me(+) *MYC* Luc), and a *MYC* promoter plus human N-Me enhancer in – orientation (hN-Me(–) *MYC* Luc) in DAUDI and RAJI B-cells.

**a**

Human chr8:130,179,992-130,181,157

```

AGGTTTCATCTCTACAGAAAGAAA
GTATAAATATGCTTTTTGTGTTCTTCTTCCCTTGATCTACATTTAGACTAT
AATTGATTGATTTTAGCTTTGAAATTTCTTCTTCTCTTTTCAAACACAG
TAAAAAGTGCCTGGCCATAAAATCTAATTGACTGAGATGATCAGTTTTAC
CAGCTTCACTACTCACTCAGAAAGGTGTTCTTAGTGGCAATTTAACA
GAGCTGTCCTTTGAAAGTGGCATTTCCTAAGTATTCCTCAAATTCGAGT
TGGGCCATAAATACAACAGGTTAAACTAAGGCAGCTGGGAAATATATAG
GTGAAAAATTACAAGGACGAGATCTTCCACTCAAGCATGTAAGGATTTA
ATCTCCAGGTTAAAAACCCAGAACACAGTATTACTTTGAGATAACAGC
TCAGAGGATGCTCAGAGATGGGTTCCCATGGTATTTCTGGGGACGGGG
CTGTGGCCCTGCAGAGGCGAGTTTCCAGTGGGGAGCACAGAGAGCCG
CTTTTACCCGATCAGGCCAGCTGTGAGCTTACTGTGGCATCTCGCTT
TCAAGGAACGGTTCCTCCAGGGTCTGCCTAGGAGAAAGTTGATGAACACA
TGGGAACGTGACAGCATATAACAGGAAAAAATGTAATAATCATGAAC
AGCAGGGCTAGGCAGGAATCTATTCTGTTAAACAGACAGTAGTAGAAGTT
ACTAAAATATCGACTCTTTTTTTGTTGTTGATATTTATTAGCTAGACG
GCAGCACCTCTCCAGGGATGCTTCTGGGATCTCTCCGGATTCATTTC
CTGTATCCATACCCAGTATCAGCCGCTCTTAGTCCCCATCATTTTAGA
CTAGATGGAGTACTTTTATGCCAGTCTCTCAAACCCATTGTTATTTCCCT
TAACTCTGGCAACAGAGTGAATCCCAATAACAGAAATCTGTCCATTTC
ACTGCTGTGCATAAAACTCTCAAATGGCCACACTTTGCTCTAAGATCCAG
TCCAAGACCCCTAAACCTATGATCAAGGCCCTCCATGAACGTGTTTCTGTA
CACATCTCCGGCTAAGATCCCACTCTCCATCCCATATACCTCCCACTC
CAGTCACAAATGCAGTGGACATTTTCTTCCATTGCCATC

```

RBPJ predicted binding sites

**b**

Human chr8:130,179,992-130,181,157

```

AGGTTTCATCTCTACAGAAAGAAA
GTATAAATATGCTTTTTGTGTTCTTCTTCCCTTGATCTACATTTAGACTAT
AATTGATTGATTTTAGCTTTGAAATTTCTTCTTCTCTTTTCAAACACAG
TAAAAAGTGCCTGGCCATAAAATCTAATTGACTGAGATGATCAGTTTTAC
CAGCTTCACTACTCACTCAGAAAGGTGTTCTTAGTGGCAATTTAACA
GAGCTGTCCTTTGAAAGTGGCATTTCCTAAGTATTCCTCAAATTCGAGT
TGGGCCATAAATACAACAGGTTAAACTAAGGCAGCTGGGAAATATATAG
GTGAAAAATTACAAGGACGAGATCTTCCACTCAAGCATGTAAGGATTTA
ATCTCCAGGTTAAAAACCCAGAACACAGTATTACTTTGAGATAACAGC
TCAGAGGATGCTCAGAGATGGGTTGGCTTGGTATTTCTGGGGACGGGG
CTGTGGCCCTGCAGAGGCGAGTTTCCCAAGTGGGGAGCACAGAGAGCCG
CTTTTACCCGATCAGGCCAGCTGTGAGCTTACTGTGGCATCTCGCTT
TCAAGGAACGGTTCCTCCAGGGTCTGCCTAGGAGAAAGTTGATGAACACA
ACGCAACTGTACAGCATATAACAGGAAAAAATGTAATAATCATGAAC
AGCAGGGCTAGGCAGGAATCTATTCTGTTAAACAGACAGTAGTAGAAGTT
ACTAAAATATCGACTCTTTTTTTGTTGTTGATATTTATTAGCTAGACG
GCAGCACCTCTCCAGGGATGCTTCTGGGATCTCTCCGGATTCATTTC
CTGTATCCATACCCAGTATCAGCCGCTCTTAGTCCCCATCATTTTAGA
CTAGATGGAGTACTTTTATGCCAGTCTCTCAAACCCATTGTTATTTCCCT
TAACTCTGGCAACAGAGTGAATCCCAATAACAGAAATCTGTCCATTTC
ACTGCTGTGCATAAAACTCTCAAATGGCCACACTTTGCTCTAAGATCCAG
TCCAAGACCCCTAAACCTATGATCAAGGCCCTCCATGAACGTGTTTCTGTA
CACATCTCCGGCTAAGATCCCACTCTCCATCCCATATACCTCCCACTC
CAGTCACAAATGCAGTGGACATTTTCTTCCATTGCCATC

```

RBPJ predicted binding sites

**c**

Mouse chr15:63,254,886-63,256,805

```

GAATTTTAAGATTTGACGAAGGAGGGGCGCAGTTGTTCACTGGCCAGGTGACTT
CATTTGCAATGCTGTTCTTAACTGACCTTCTACTCTTCTGTTATCTGTGACACTAT
GTCCTACAGTGTGGTACTCTTACCAGTAAGTTTGAAGTGGAGTGGCCATTTGGG
TGGCCACTTTAAATAATGGAAGTGGGAATGGGAAGTAAACATAGTAGTTGGCCCA
CTGATCTCCACTTCCAGGCAATFACCACTGATGAGTGGCTAGCCCTCTCCCTGAAA
TTGGTCTACTCTCTTCTAGATCACTCATCTCTCTGATCCAAAGCTCTCACATGA
TGACTCCATGACATGTGATTCCTGAACTGGCTGTTTCAGCATCTGCATCCGG
ATGTATACCTGCCCTGATATATCTACTAAGATTTGTTCTGCCACTCATGTCTTG
CCAAATGCCCTACTGATCTCCCATTTGCTACATAGACTTTTTAGACCTCTCTCAA
AAATGGTGACTTCTACTGTATGCAAGATGAACACACTATAGCAGCACTCAAATGA
CCTTTGCTGCACTTGCATCTATAAAAAGCCTGAATAGTTTTTTGTTATTTCTTC
CTCTTGATCTACATTTAGTGTAACTGTTGATTTCTACTCCCAAATGTTGTTTC
TCTCTTTCAGAACTCTTAAAAAAATGCTCGGTCTGAAACCTAAATGGACTGAAA
TCATCAGCTTCCACAGTTCACCTGCACTCACTCAGAAAGCTACTCTTAGAGGCA
ATTTGACAGAGCTGTCTTTGAAACTGGCATTTCCTAAGTGTCTCTCTAAATFAC
AGTTGGCCATAAATATGGCAGGTTAAACGGAGACAGCTGAGAAATGGTGTAGTT
GAAAAATTACAAGGATGGGATCTTCTCCCTTCCACATGAAGATTTAATCTGCC
AGATTAATAAACCCTGAACCTGGTGTGTTGTCAGAGTAAACAGCTTGGAGGATGC
TCAGAGATGGGTTCCAGGGTGTGTTTCAAGGATGGGCTGTGGCCATCAGAGGC
AGGTGTTTCTCAGTTGGAGCAGAGGAGTCTTGGCACCAGCACTGGGCCAGCT
GTGAGTTTATCTGTGGTATCTGGGTTTCAAAGTGTGTTCCCTGCACTGTGCCA
AAAGAAAGAGATGATCAAGATGAACGAAGAGGTAATGCACCTGACTCTACTCTG
ATGGGAAAAAGGGGGAGAAATATGAAAGAAAAATATATATATATATATATATATG
AAATATATAGTTATGTTGATATATATATATATATATATATATATATATATATG
AATTTATCTATAGGAGATTAATAACAAGATATGTACACTTTACAATCTGTGGAC
ATCCAGTATAGAGAATGTGTCTGAGATTTTTCATGATCGTCTCCCTTTTCT
GCATTTGTCATCACTCCCAATTCACCTCTCATGAATAAAATCACTTCACTGGCAAT
AGGTTTGTGGAGATGGAGATCTGTCCCAATTCCTAGTTACTCTCTGGGAAAT
GGCTCTGTATGTACACATGTTCTCTAGCTATGTAATAAAGACCTCTCTTCCCTT
GGCAAACTTAACTCTACTTAGAAAACCTCTGATGAGTACTAGAAAGATGCATG
TTCACAAAAGCTTAAAGTGAATCAGGGTTACACAACAAGAAAGGAGATGCTATAT
TGTCTTTCATGACATAGGCTTAAAGTCCATAGCATAACTTCTATAACACACAAG
TGGGTAAGAGGTTTCAAAGACCTGTCTAGTTTAAAGACAAGACTTCTATGATGTA
GAGTGGGAGGAGGGGAGCCAGAGATGAAATGTTGTTGGAGTTGTTGGGAAAG
AAACAATTTGATATGGGAAAGGAATATACACTACTTATTTCTATGCGA

```

RBPJ predicted binding sites

**d**

Mouse chr15:63,254,886-63,256,805

```

GAATTTTAAGATTTGACGAAGGAGGGGCGCAGTTGTTCACTGGCCAGGTGACTT
CATTTGCAATGCTGTTCTTAACTGACCTTCTACTCTTCTGTTATCTGTGACACTAT
GTCCTACAGTGTGGTACTCTTACCAGTAAGTTTGAAGTGGAGTGGCCATTTGGG
TGGCCACTTTAAATAATGGAAGTGGGAATGGGAAGTAAACATAGTAGTTGGCCGT
CTGATCTCCACTTCCAGGCAATFACCTCTGATGAGTGGCTAGCCCTCTCCCTGAAA
TTGGTCTACTCTCTTCTAGATCACTCATCTCTCTGATCCAAAGCTCTGAGTTGA
TGACTCCATGACATGTGATTCCTGGTAACTGGCTGTTTCAGCATCTGCATCCCG
ATGTATACCTGCCCTGATATATCTACTAAGATTTGTTCTGCCACTCATGTCTTG
CCAAATGCCCTACTGATCTCCCATTTGCTACATAGACTTTTTAGACCTCTCTCAA
AAATGGTGACTTCTACTGTATGCAAGATGAACACACTATAGCAGCACTCAAATGA
CCTTTGCTGCACTTGCATCTATAAAAAGCCTGAATAGTTTTTTGTTATTTCTTC
CTCTTGATCTACATTTAGTGTAACTGTTGATTTCTACTCCCAAATGTTGTTTC
TCTCTTTCAGAACTCTTAAAAAAATGCTCGGTCTGAAACCTAAATGGACTGAAA
TCATCAGCTTCCACAGTTCACCTGCACTCACTCAGAAAGCTACTCTTAGAGGCA
ATTTGACAGAGCTGTCTTTGAAACTGGCATTTCCTAAGTGTCTCTCTAAATFAC
AGTTGGCCATAAATATGGCAGGTTAAACGGAGACAGCTGAGAAATGGTGTAGTT
GAAAAATTACAAGGATGGGATCTTCTCCCTTCCACATGAAGATTTAATCTGCC
AGATTAATAAACCCTGAACCTGGTGTGTTGTCAGAGTAAACAGCTTGGAGGATGC
TCAGAGATGGGTTCCAGGGTGTGTTTCAAGGATGGGCTGTGGCCATCAGAGGC
AGGTGTTTCTCAGTTGGAGCAGAGGAGTCTTGGCACCAGCACTGGGCCAGCT
GTGAGTTTATCTGTGGTATCTGGCTTCAAAGTGTGTTCCCTGCACTGTGCCA
AAAGAAAGAGATGATCAAGATGAACGAAGAGGTAATGCACCTGACTCTACTCTG
AAGCAGAAAGGGGGAGAAATATGAAAGAAAAATATATATGACATGATATATG
AAATATATAGTTATGTTGATATATATATATATATATATATATATATATATATG
AATTTATCTATAGGAGATTAATAACAAGATATGTACACTTTACAATCTGTGGAC
ATCCAGTATAGAGAATGTGTCTGAGATTTTTCATGATCGTCTCCCTTTTCT
GCATTTGTCATCACTCCCAATTCACCTCTCATGAATAAAATCACTTCACTGGCC
AGGTTTGTGGAGATGGAGATCTGTGGTAATCCCTCAGTTACTCTCTAGCAAT
GGCTCTGTATGTAGATTTGTTTCTAGCTATGTAATAAAGACCTCTCTTCCCTT
GGCAAACTTAACTCTACTTAGAAAACCTCTGATGAGTACTAGAAAGATGCATG
TTCACAAAAGCTTAAAGTGAATCAGGGTTACACAACAAGAAAGGAGATGCTATAT
TGTCTTTCATGACATAGGCTTAAAGTCCCAAGTAACTCTATAACACACAAG
TGGGTAAGAGGTTTCAAAGACCTGTCTAGTTTAAAGACAAGACTTCTATGATGTA
GAGTGGGAGGAGGGGAGCCAGAGATGAAATGTTGTTGGAGTTGTTGGGAAAG
AAACAATTTGATATGGGAAAGGAATATACACTACTTATTTCTATGCGA

```

RBPJ predicted binding sites

**Supplementary Figure 5. N-Me DNA sequence. (a) Human N-Me wild type sequence. (b) Human N-Me sequence containing mutations in 7 RBPJ binding sites. Mutated bases are shown in red. (c) Mouse N-Me wild type sequence. (d) Mouse N-Me sequence containing mutations in 11 RBPJ binding sites. Mutated bases are shown in red**

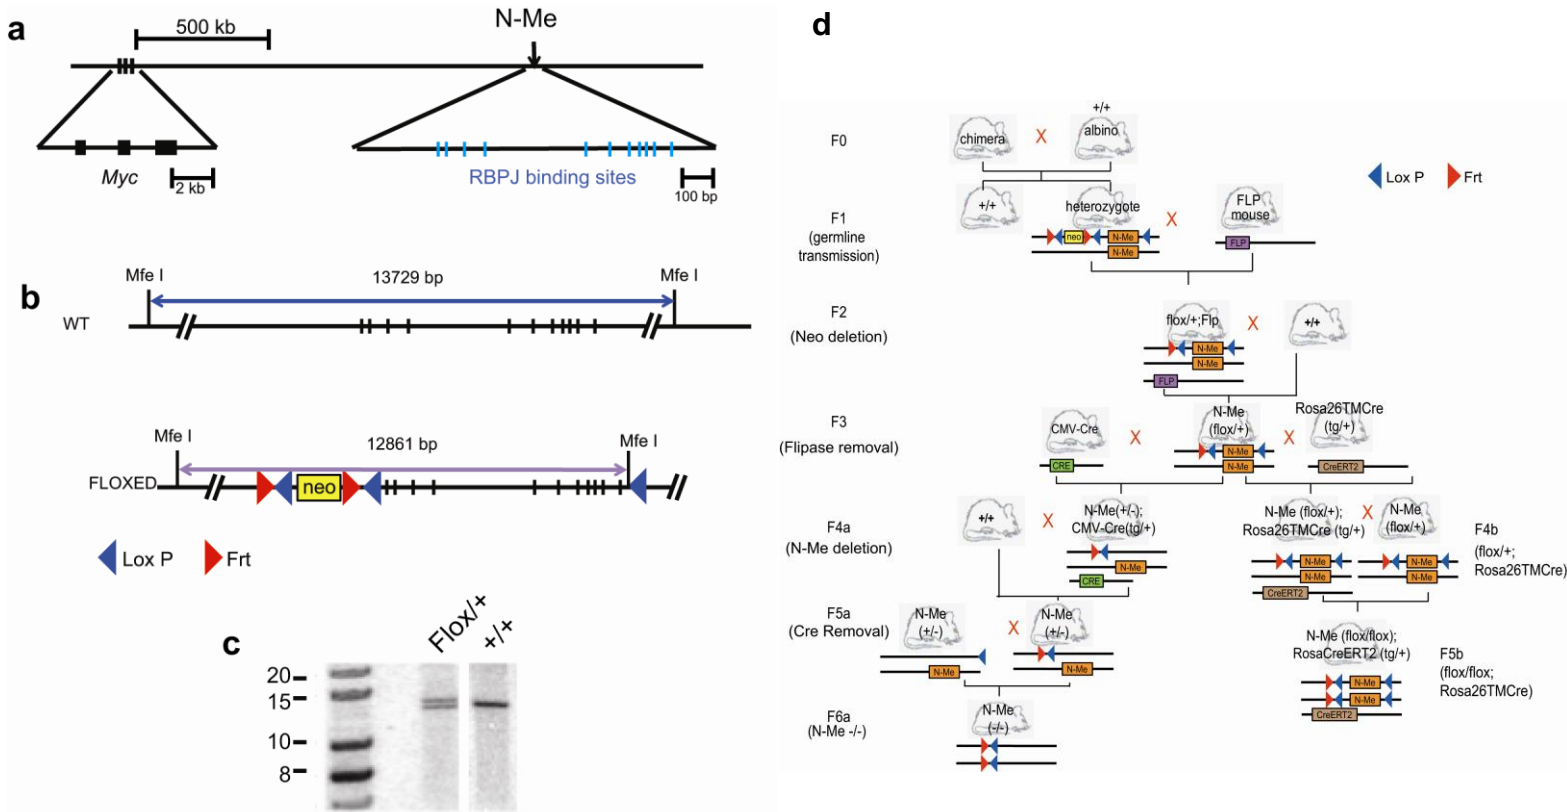

**Supplementary Figure 6.** Conditional targeting of the N-Me enhancer in mouse embryonic stem cells. **(a)** Schematic representation of the mouse *Myc* locus indicating the position of the N-Me enhancer. **(b)** Schematic representation of the targeting strategy for generation of N-Me conditional knockout allele. **(c)** Southern blot analysis of N-Me targeted embryonic stem cells in DNA digestions with the *MfeI* restriction enzyme hybridized with a long arm DNA probe. **(d)** Schematic representation of the breeding strategy for the generation of N-Me knockout and conditional knockout mice.

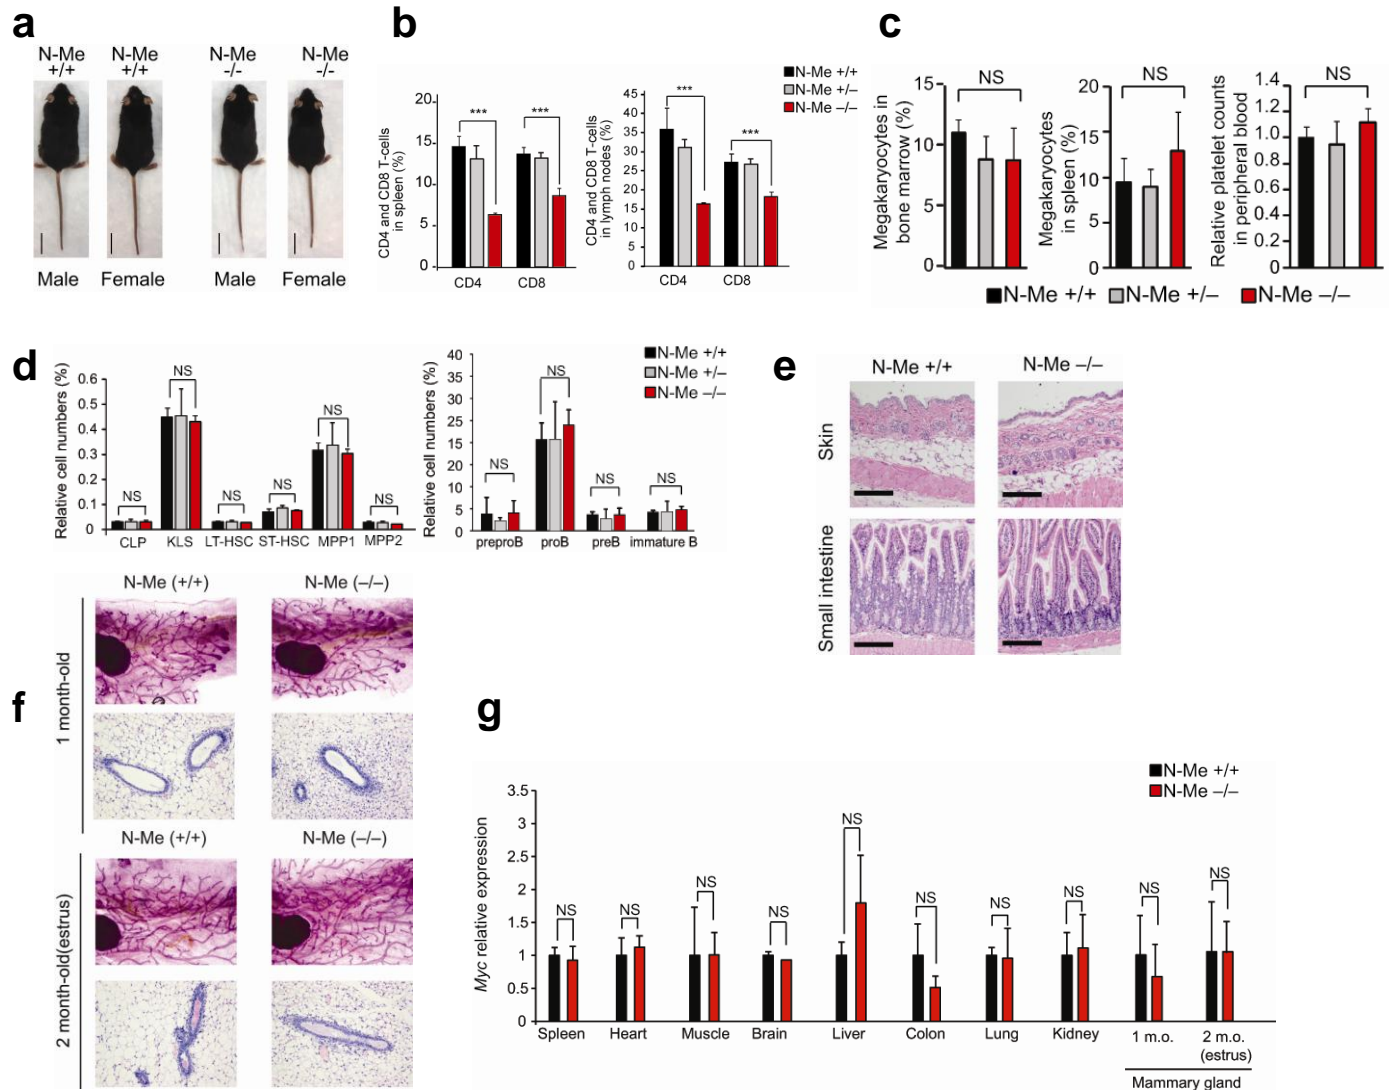

**Supplementary Figure 7.** Phenotypic characterization of N-Me knockout mice. **(a)** Representative images of 6 week-old N-Me conditional knockout mice and littermate wild type controls. Scale bar: 2 cm. **(b)** Quantification of T-cell populations in spleen and lymph nodes of N-Me wild type, heterozygous or homozygous knockout mice. **(c)** Quantification of megakaryocytes in bone marrow and spleen and platelets in peripheral blood from N-Me wild type, heterozygous or homozygous knockout mice. **(d)** Quantification of bone marrow stem cells, lymphoid and myeloid progenitors in N-Me wild type, N-Me heterozygous and N-Me null mice. CLP: common lymphocyte progenitors. KLS: cKit<sup>+</sup>, Lin<sup>-</sup>, Sca1<sup>+</sup> population. LT-HSC: long term hematopoietic stem cells. ST-HSC: short term hematopoietic stem cells. MPP1: multipotential progenitor 1 population. MPP2: multipotential progenitor 2 population. Bar graphs indicate mean values and error bars represent s.d. **(e)** Hematoxylin eosin stained microphotographs of skin and small intestine from wild type and N-Me knockout mice. Scale bar: 100  $\mu$ m **(f)** Carmine red stained and hematoxylin/eosin stained microphotographs of mammary glands from wild type and N-Me knockout females. Scale bar: 100 $\mu$ m. **(g)** RT-PCR analysis of *Myc* expression in tissues from wild type and N-Me knockout mice. Bar graphs indicate mean values and error bars represent s.d. *P* values in **(b,c,d,g)** were calculated using the two-tailed Student's *t*-test: NS= not significant; \*\*\**P*≤0.005.

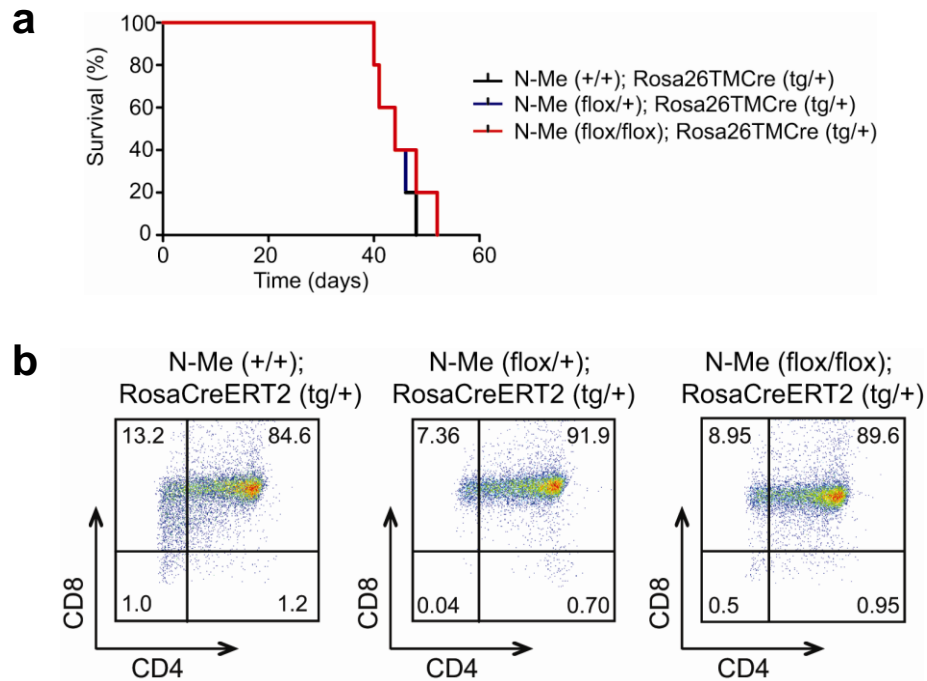

**Supplementary Figure 8.** Generation of wild type and inducible conditional N-Me heterozygous and homozygous knockout NOTCH1 induced T-ALLs. **(a)** Kaplan-Meier survival curves of mice transplanted with wild type and conditional N-Me heterozygous and homozygous knockout hematopoietic progenitors infected with retroviruses driving expression of constitutively active  $\Delta E$ -NOTCH1. **(b)**. Representative FACS plots showing robust expression of CD4 and CD8 T-cell markers in wild type and inducible conditional N-Me heterozygous and homozygous knockout NOTCH1 induced T-ALLs.



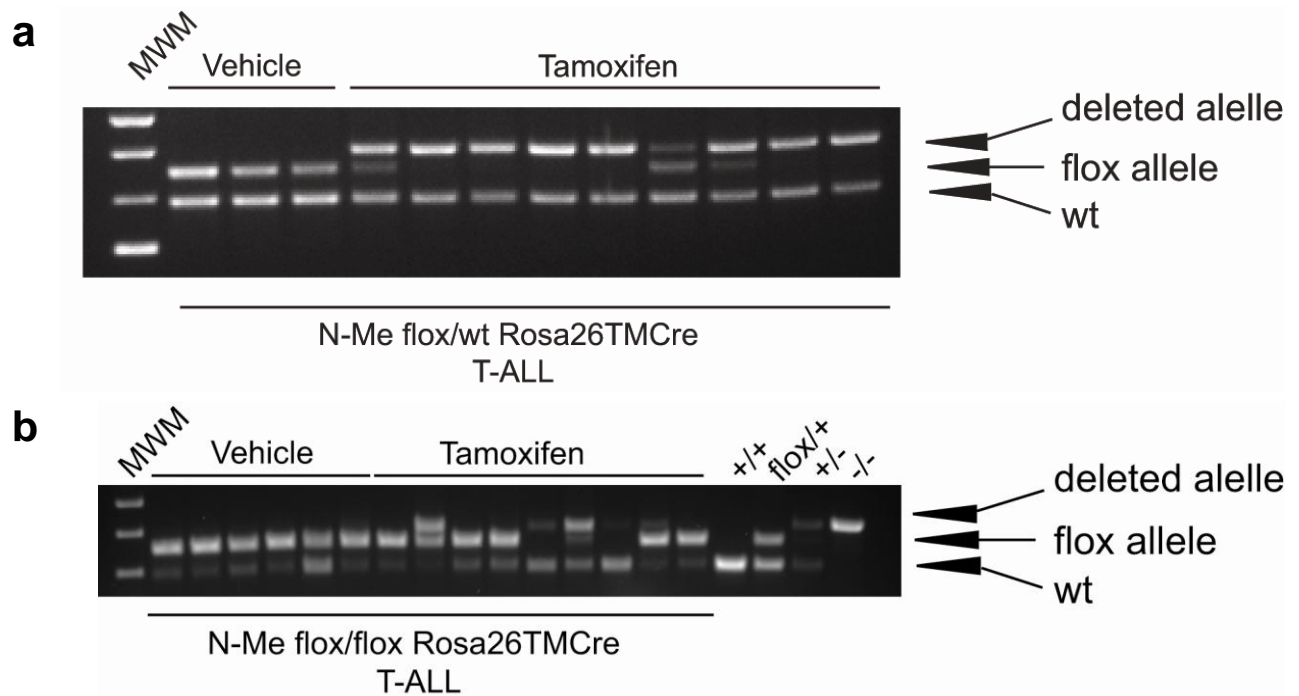

**Supplementary Figure 9.** PCR analysis of N-Me loss in NOTCH1-induced tumors with secondary (tamoxifen-induced) deletion of N-Me at the time of tumor progression. **(a)** DNA from N-Me conditional heterozygous NOTCH1 induced leukemias treated with vehicle only, or with tamoxifen to induce the deletion of one copy of N-Me, was recovered from the spleen of moribund mice at the time of overt tumor progression and was analyzed by PCR. **(b)** DNA from N-Me conditional homozygous knockout NOTCH1 induced leukemias treated with vehicle only, or with tamoxifen to induce the deletion of the 2 copies of N-Me, was recovered from the spleen of moribund mice at the time of overt tumor progression and was analyzed by PCR together with wild type, conditional heterozygous, deleted heterozygous and deleted homozygous controls. Wild type band in tumor samples is derived from residual recipient derived stroma cells.

**a**

| <b>N-Me (flox/flox); RosaTMCre (tg/+) – Vehicle treated</b>   |                         |                                    |
|---------------------------------------------------------------|-------------------------|------------------------------------|
| Number of cells injected/mouse                                | Number of mice injected | Number of leukemia-developing mice |
| 100.000                                                       | 6                       | 6                                  |
| 10.000                                                        | 11                      | 11                                 |
| 1.000                                                         | 12                      | 12                                 |
| 100                                                           | 6                       | 4                                  |
| 10                                                            | 6                       | 1                                  |
| <b>N-Me (flox/flox); RosaTMCre (tg/+) – Tamoxifen treated</b> |                         |                                    |
| Number of cells injected/mouse                                | Number of mice injected | Number of leukemia-developing mice |
| 100.000                                                       | 6                       | 6                                  |
| 10.000                                                        | 12                      | 5                                  |
| 1.000                                                         | 10                      | 2                                  |
| 100                                                           | 6                       | 0                                  |
| 10                                                            | 6                       | 0                                  |

**b**

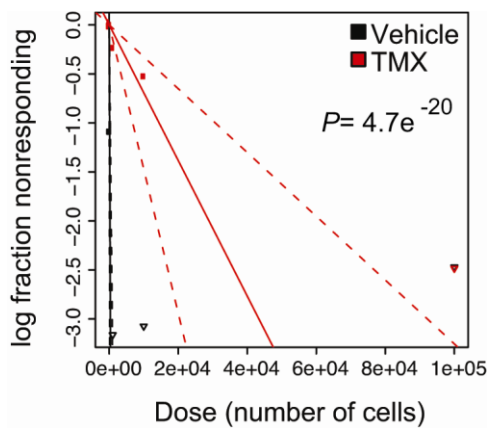

**c**

| <b>Confidence intervals for 1/(stem cell frequency)</b> |       |          |       |
|---------------------------------------------------------|-------|----------|-------|
| Group                                                   | Lower | Estimate | Upper |
| Vehicle                                                 | 212   | 83.6     | 33.2  |
| Tamoxifen                                               | 30728 | 14457    | 6802  |

**Supplementary Figure 10.** Effects of N-Me deletion in leukemia initiating cell activity. (a) Tumor incidence in mice treated with vehicle only (control) or tamoxifen (N-Me deletion) after transplantation of with serial dilutions of N-Me conditional knockout cells. (b) Serial dilution leukemia initiating cell analysis plot in mice treated with vehicle only (control) or tamoxifen (TMX, N-Me deletion) after transplantation of with serial dilutions of N-Me conditional knockout cells. (c) Confidence intervals showing 1/stem cell frequency.

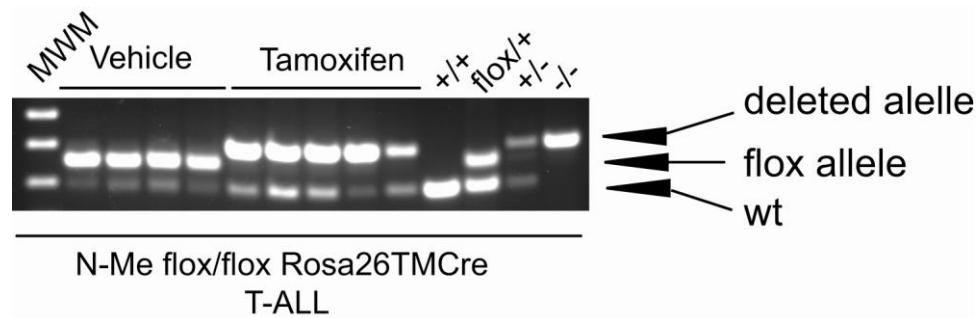

**Supplementary Figure 11.** PCR analysis of N-Me loss in NOTCH1-induced tumors after acute secondary (tamoxifen-induced) homozygous deletion of N-Me. DNA from N-Me conditional NOTCH1 induced leukemias treated with vehicle only or tamoxifen recovered from the spleen of mice 40 hours after treatment was analyzed by PCR together with wild type, conditional heterozygous, deleted heterozygous and deleted homozygous controls. Wild type band in tumor samples is derived from residual recipient derived stroma cells.

**Supplementary Table 1.** Recurrent focal genomic amplifications at +1.4 Mb downstream of *MYC* in T-ALL cases. Genomic positions in hg19 assembly are shown.

| Case ID | CGH-array platform | Duplication Start (bp) | Duplication End (bp) | Duplication size (bp) |
|---------|--------------------|------------------------|----------------------|-----------------------|
| TL24    | 244K               | 130 041 807            | 130 324 436          | 282 629               |
| TL52    | 244K               | 130 041 807            | 130 293 604          | 251 797               |
| TL63    | 1000K              | 130 161 775            | 130 404 122          | 242 347               |
| TL67    | 1000K              | 130 161 775            | 130 202 012          | 40 237                |
| LS015   | 180K               | 129 957 380            | 130 233 454          | 276 074               |
| LS071   | 1000K              | 130 055 124            | 130 342 220          | 287 096               |
| LS183   | 400K               | 130 156 555            | 130 239 307          | 82 752                |
| LS190   | 400K               | 130 140 325            | 130 282 315          | 141 990               |

**Supplementary Table 2.** Oncogenic annotations of the T-ALL cases with N-Me focal amplifications

| Case ID | Oncogenic subtype | <i>NOTCH1</i> mutations | <i>FBXW7</i> mutations |
|---------|-------------------|-------------------------|------------------------|
| TL24    | TAL-R             | p.L1600P, p.P2514fs     | Neg                    |
| TL52    | TLX1              | p.L1585P                | Neg                    |
| TL63    | TLX3              | p.L1574P, p.Q2519 fs    | Neg                    |
| TL67    | TLX3              | p.L1585P                | Neg                    |
| LS015   | TLX1              | p.F1590delinsW          | Neg                    |
| LS071   | CALM-AF10         | na                      | na                     |
| LS183   | TCRB-MYB          | Neg                     | Neg                    |
| LS190   | Unknown           | Neg                     | Neg                    |

TAL-R, TAL-related; Neg, negative; na, not available.

**Supplementary Table 3.** Genetic frequencies in N-Me flox/+ x N-Me flox/+ offspring and N-Me +/- x N-Me +/- offspring

| <b>N-Me flox/+ x N-Me flox/+</b> |                                            |                                 |
|----------------------------------|--------------------------------------------|---------------------------------|
| Genotype                         | Expected Mendelian genetic frequencies (%) | Observed frequencies (%) (n=44) |
| N-Me +/+                         | 25                                         | 25                              |
| N-Me +/-                         | 50                                         | 45.5                            |
| N-Me -/-                         | 25                                         | 29.5                            |
| <b>N-Me +/- x N-Me +/-</b>       |                                            |                                 |
| Genotype                         | Expected Mendelian genetic frequencies (%) | Observed frequencies (%) (n=38) |
| N-Me +/+                         | 25                                         | 23.7                            |
| N-Me +/-                         | 50                                         | 55.2                            |
| N-Me -/-                         | 25                                         | 21                              |

**Supplementary Table 4.** DAVID functional annotation analysis of downregulated genes upon N-Me deletion in NOTCH1 induced T-ALL cells

| Term                                                    | Count | P Value  | FDR      |
|---------------------------------------------------------|-------|----------|----------|
| acetylation                                             | 56    | 3.64E-11 | 4.65E-08 |
| GO:0005730~nucleolus                                    | 19    | 7.40E-11 | 9.23E-08 |
| GO:0031974~membrane-enclosed lumen                      | 34    | 1.57E-10 | 1.96E-07 |
| GO:0070013~intracellular organelle lumen                | 33    | 2.92E-10 | 3.64E-07 |
| GO:0043233~organelle lumen                              | 33    | 3.12E-10 | 3.89E-07 |
| GO:0034660~ncRNA metabolic process                      | 16    | 6.15E-10 | 9.52E-07 |
| GO:0034470~ncRNA processing                             | 14    | 2.62E-09 | 4.06E-06 |
| GO:0031981~nuclear lumen                                | 27    | 9.12E-09 | 1.14E-05 |
| GO:0005739~mitochondrion                                | 30    | 6.66E-07 | 8.31E-04 |
| GO:0042254~ribosome biogenesis                          | 10    | 1.00E-06 | 1.55E-03 |
| GO:0006399~tRNA metabolic process                       | 10    | 1.08E-06 | 1.67E-03 |
| GO:0003723~RNA binding                                  | 21    | 3.35E-06 | 4.48E-03 |
| GO:0008033~tRNA processing                              | 8     | 3.88E-06 | 6.01E-03 |
| GO:0022613~ribonucleoprotein complex biogenesis         | 10    | 5.36E-06 | 8.30E-03 |
| GO:0006396~RNA processing                               | 16    | 1.38E-05 | 2.14E-02 |
| trna processing                                         | 7     | 2.86E-05 | 3.66E-02 |
| GO:0043232~intracellular non-membrane-bounded organelle | 33    | 5.32E-05 | 6.64E-02 |
| GO:0043228~non-membrane-bounded organelle               | 33    | 5.32E-05 | 6.64E-02 |
| GO:0006364~rRNA processing                              | 7     | 6.52E-05 | 1.01E-01 |
| GO:0016072~rRNA metabolic process                       | 7     | 7.04E-05 | 1.09E-01 |
| transit peptide                                         | 15    | 1.17E-04 | 1.50E-01 |
| GO:0044271~nitrogen compound biosynthetic process       | 12    | 1.23E-04 | 1.90E-01 |
| nucleus                                                 | 56    | 4.41E-04 | 5.63E-01 |
| rna-binding                                             | 14    | 7.32E-04 | 9.33E-01 |
| GO:0008652~cellular amino acid biosynthetic process     | 5     | 7.40E-04 | 1.14E+00 |
| transit peptide:Mitochondrion                           | 14    | 8.65E-04 | 1.25E+00 |
| Isomerase                                               | 7     | 9.05E-04 | 1.15E+00 |
| amino-acid biosynthesis                                 | 4     | 9.78E-04 | 1.24E+00 |
| mitochondrion                                           | 18    | 1.37E-03 | 1.73E+00 |
| GO:0006563~L-serine metabolic process                   | 3     | 1.77E-03 | 2.70E+00 |
| active site:Nucleophile                                 | 8     | 1.91E-03 | 2.75E+00 |
| GO:0046394~carboxylic acid biosynthetic process         | 7     | 2.08E-03 | 3.17E+00 |

|                                                                     |    |          |          |
|---------------------------------------------------------------------|----|----------|----------|
| GO:0016053~organic acid biosynthetic process                        | 7  | 2.08E-03 | 3.17E+00 |
| methyltransferase                                                   | 7  | 2.33E-03 | 2.94E+00 |
| phosphoprotein                                                      | 79 | 2.34E-03 | 2.96E+00 |
| region of interest:S-adenosyl-L-methionine binding                  | 4  | 3.01E-03 | 4.29E+00 |
| purine biosynthesis                                                 | 3  | 4.63E-03 | 5.77E+00 |
| GO:0009309~amine biosynthetic process                               | 5  | 4.82E-03 | 7.20E+00 |
| GO:0009982~pseudouridine synthase activity                          | 3  | 5.28E-03 | 6.83E+00 |
| GO:0006974~response to DNA damage stimulus                          | 9  | 5.52E-03 | 8.21E+00 |
| GO:0006259~DNA metabolic process                                    | 11 | 6.11E-03 | 9.05E+00 |
| GO:0009127~purine nucleoside monophosphate biosynthetic process     | 3  | 6.32E-03 | 9.34E+00 |
| GO:0009168~purine ribonucleoside monophosphate biosynthetic process | 3  | 6.32E-03 | 9.34E+00 |
| GO:0001522~pseudouridine synthesis                                  | 3  | 6.32E-03 | 9.34E+00 |
| GO:0009451~RNA modification                                         | 4  | 7.02E-03 | 1.03E+01 |
| GO:0009064~glutamine family amino acid metabolic process            | 4  | 7.49E-03 | 1.10E+01 |
| GO:0009167~purine ribonucleoside monophosphate metabolic process    | 3  | 8.40E-03 | 1.22E+01 |
| GO:0009126~purine nucleoside monophosphate metabolic process        | 3  | 8.40E-03 | 1.22E+01 |
